# Supplementary figures and images for: Biohybrid hematopoietic niche for expansion of hematopoietic stem/progenitor cells by using geometrically controlled fibrous layers
Source: Royal Society of Chemistry journal article supplement (doi:10.1039/c5ra13332g), 2015-01-01

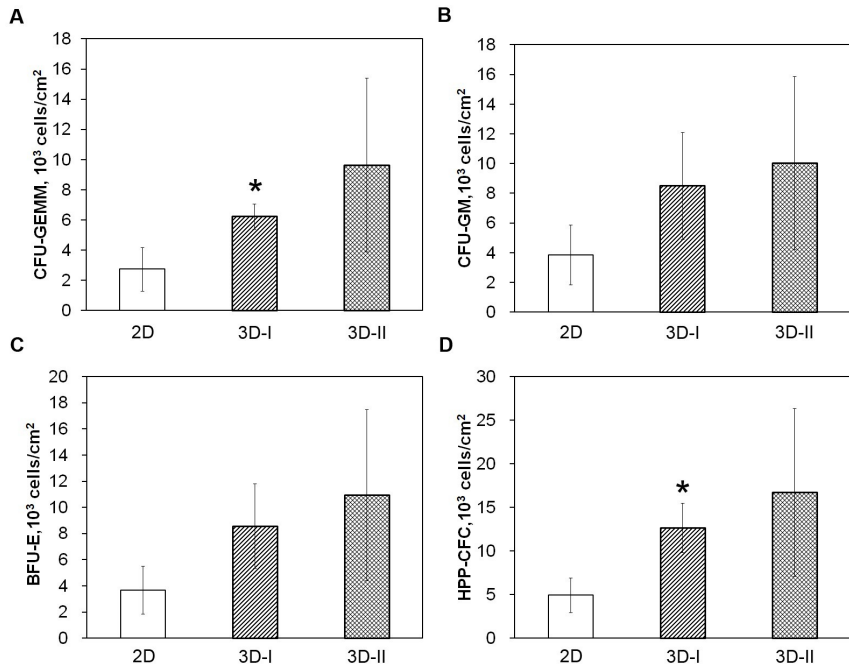

Supplement: c5ra13332g2.pdf [file c5ra13332g2.pdf]
